# Supplementary material for: High performance dye anchored counter electrodes with a SPSQ2 sensitizer for dye sensitized solar cell applications
Source: Royal Society of Chemistry journal article supplement (doi:10.1039/c6qm00101g), 2016-10-27
Supplement: c6qm00101g1.pdf [file c6qm00101g1.pdf]

## High Performance Dye Anchored Counter Electrodes with SPSQ2 Sensitizer for Dye Sensitized Solar Cell Applications

K. Susmitha<sup>a</sup>, M. Gurulakshmi<sup>a</sup>, M. Naresh Kumar<sup>d</sup>, L. Giribabu<sup>b, c, †</sup>, G. Hanumantha Rao<sup>b, c</sup>,  
Surya Prakash Singh<sup>b, c, †</sup>, S. Narendra Babu<sup>d</sup>, M. Srinivas<sup>e</sup>, M. Raghavender<sup>a, †, \*</sup>

\* Corresponding author Email: toraghavender@rediffmail.com (M. Raghavender).

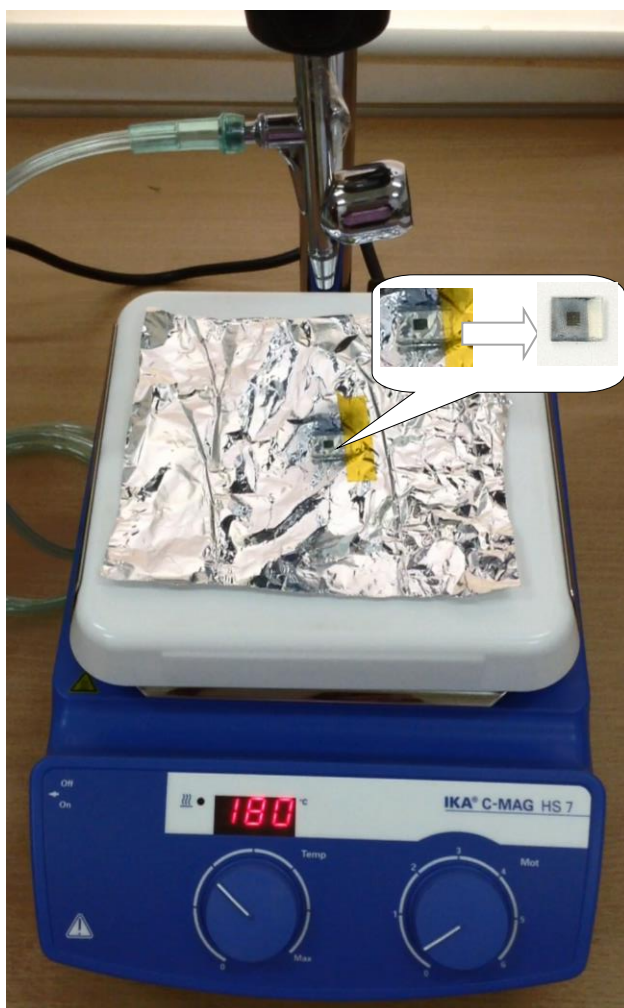

**Fig. S1** Photograph of simple air spray, hotplate for counter electrodes preparation.

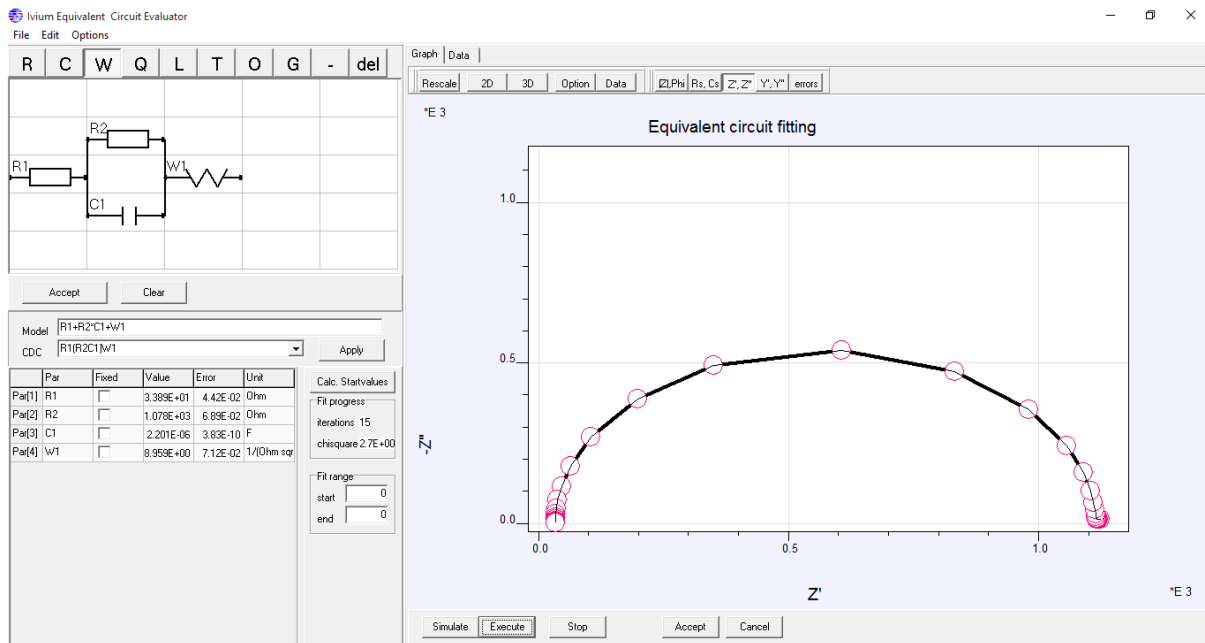

**Fig. S2(a)** Print-Screen image of the PEDOT:PSS sprayed DACE–DSSC sample EIS analysis.

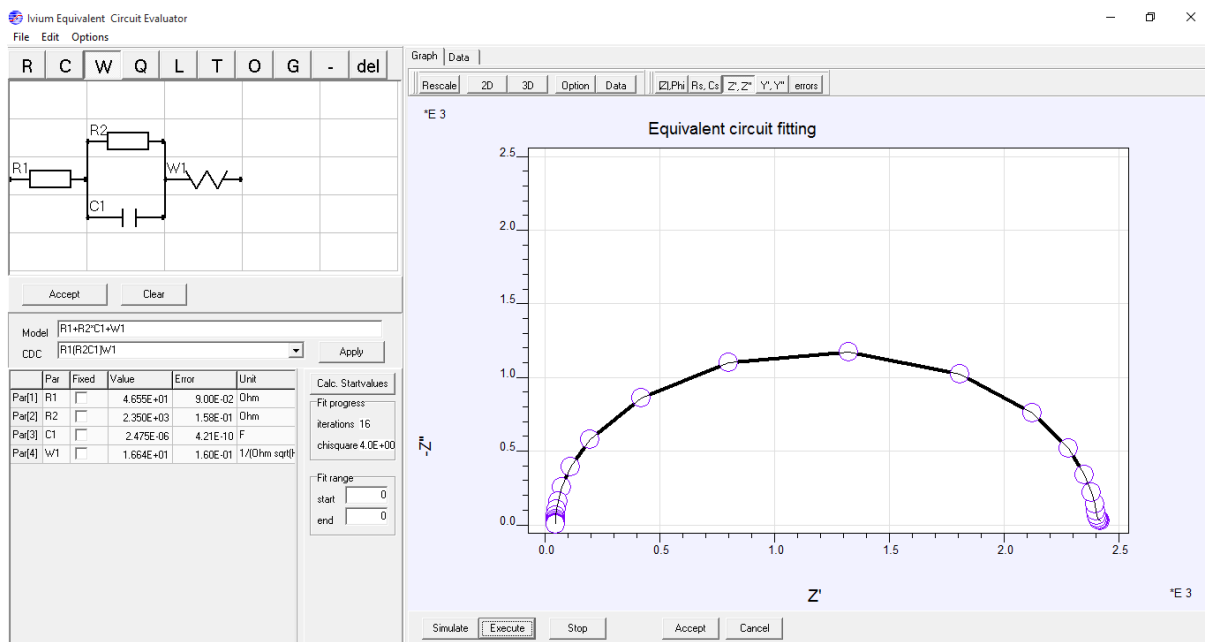

**Fig. S2(b)** Print-Screen image of the DACE –DSSC sample EIS analysis.

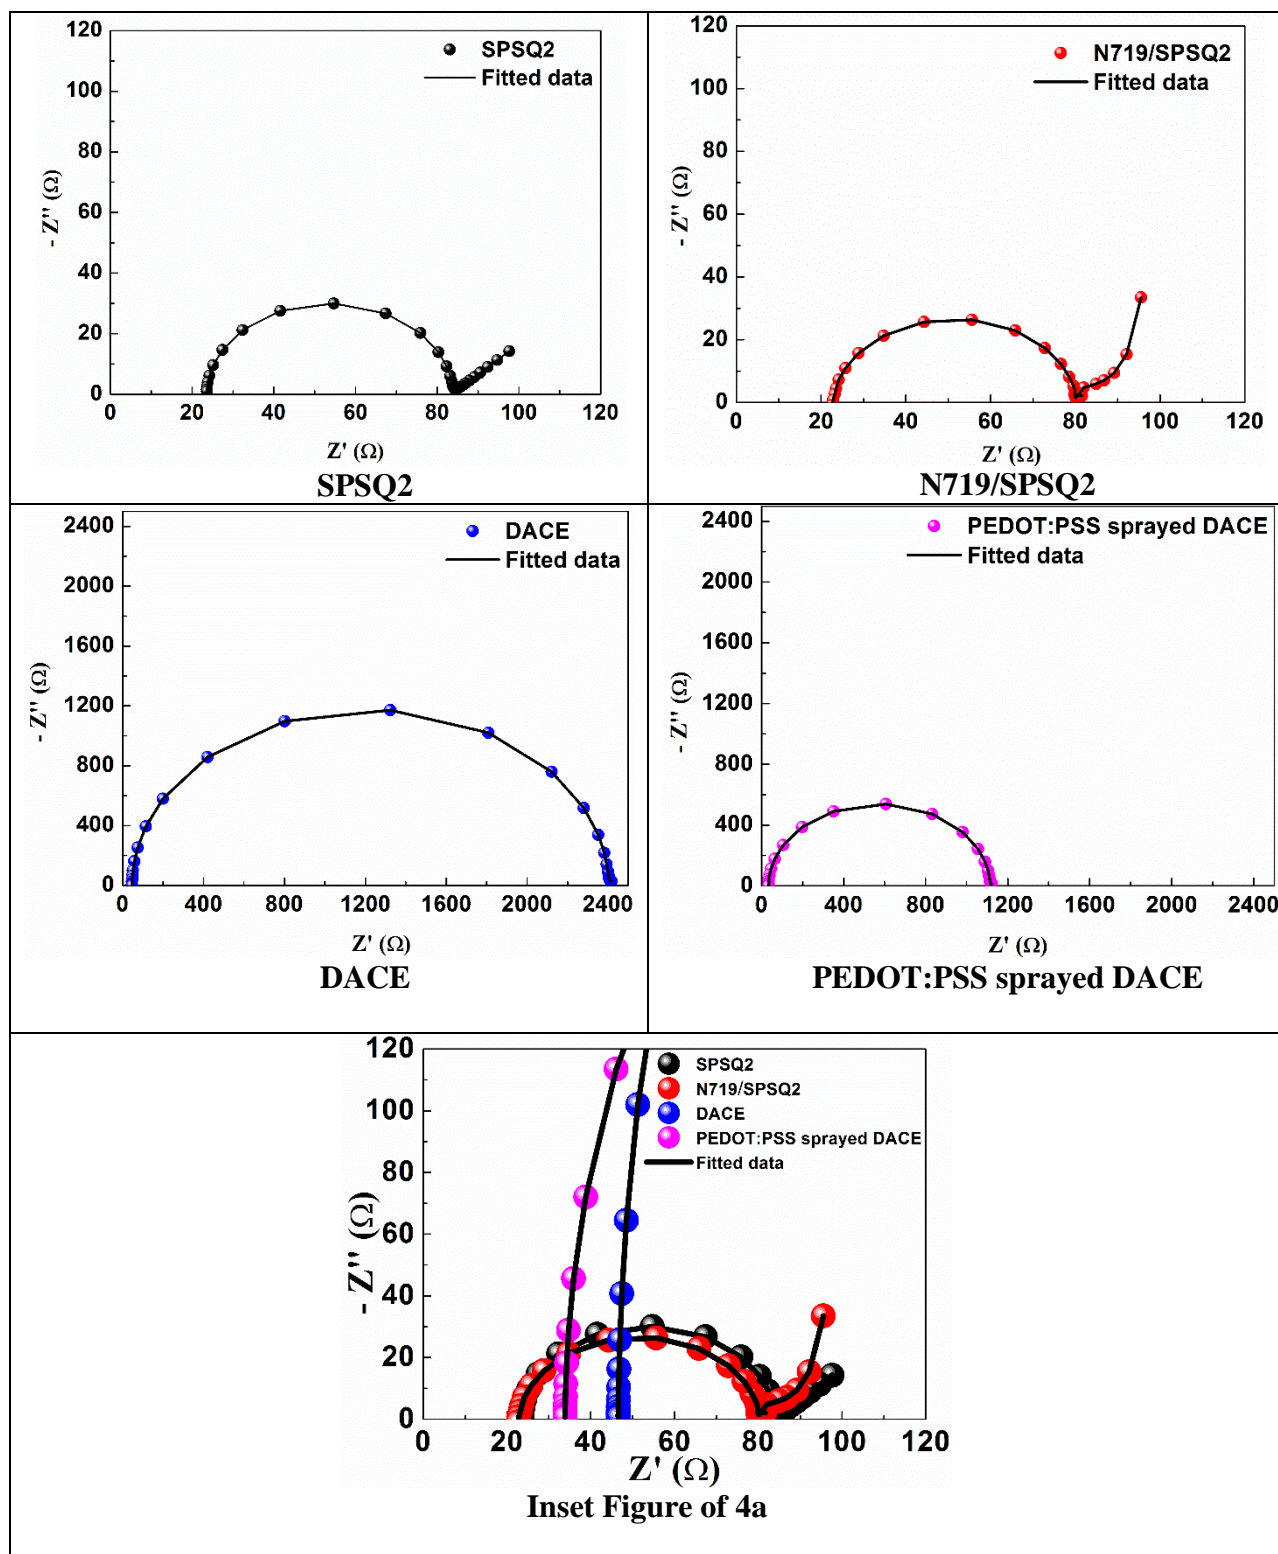

**Fig. S3** Details of Electrochemical Impedance Spectroscopic (EIS) studies of test cells.
